# Supplementary material for: Using DNA Metabarcoding to Identify Floral Visitation by Pollinators
Source: Preprints.org preprint supplement (doi:10.20944/preprints202202.0018.v1), 2022-02-01
Supplement: Supplementary file 1 [file supplementary]

## Sheet: Table S2
Table S2: Details of studies which use plant DNA metabarcoding to identify floral visitation by pollinators or developed methods to support
Author	Year	Title	Country and Continent	Plant DNA source	Extraction method	DNA Region	Type of study	Question	Aim of study specifically related to pollen metabarcoding
Arstingstall et al.	2021	Capabilities and limitations of using DNA metabarcoding to study plant‐pollinator interactions	USA, North America	pollen from whole body	Macherey-Nagel Food Kit (silica-based membrane)	ITS2, rbcL	Specific methodological question	How do the results from metabarcoding and observation compare?	To assess whether specialisation and species richness differs between metabarcoding and observational networks?
Baksay et al.	2020	Experimental quantification of pollen with DNA metabarcoding using ITS1 and trnL	N/A	mock pollen samples	DNeasy plant mini extraction kit (silica-based membrane)	ITS1, tnrL	Specific methodological question	Is DNA metabarcoding quantitative?	To investigate the relationship between the amount of pollen grains in mock solutions and the abundance of sequence reads
﻿Bänsch et al.	2020	Using ITS2 metabarcoding and microscopy to analyze shifts in pollen diets of honey bees and bumble bees along a mass‐flowering crop gradient	Germany, Europe	pollen from legs	DNeasy plant mini extraction kit (silica-based membrane)	ITS2	Specific ecological question	How is foraging affected by resource availability?	To assess how honeybee and bumblebee foraging is affected by a mass-flowering crop
Cornman et al.	2015	Taxonomic characterization of honey bee (Apis mellifera) pollen foraging based on non-overlapping paired-end sequencing of nuclear ribosomal loci	USA, North America	pollen from legs	CTAB and phenol:chloroform extraction	ITS1, ITS2	Identifying floral resource use		To investigate pollen foraging by honeybees
Bell et al.	2019	Quantitative and qualitative assessment of pollen DNA metabarcoding using constructed species mixtures	N/A	mock pollen samples	FastDNA™SPIN Kit for Soil	ITS2, rbcL	Specific methodological question	Is DNA metabarcoding quantitative?	To test the quantitative and qualitative robustness of metabarcoding in constructed pollen mixtures
Biella et al.	2019	Foraging strategies are maintained despite workforce reduction: A multidisciplinary survey on the pollen collected by a social pollinator	Czech Republic, Europe	pollen from legs	Not stated	ITS2	Specific ecological question	What is the relationship between plant use and pollinator health?	To investigate the foraging of Bombus terrestris in a situation of workforce loss
Bontšutšnaja et al.	2021	Bumble Bee Foraged Pollen Analyses in Spring Time in Southern Estonia Shows Abundant Food Sources	Estonia, Europe	pollen from legs	Invisorb spin tissue mini kit (silica-based membrane)	ITS2	Specific ecological question	How is foraging affected by resource availability?	To investigate whether pollen use change over sites and landscape?
Cannizzaro et al	2021	Forest landscapes increase diversity of honeybee diets in the tropics	Papua New Guinea, Australia and Oceania	pollen from bee bread	DNeasy plant mini extraction kit (silica-based membrane)	rbcL	Specific ecological question	How is foraging affected by resource availability?	To identify the key species used by honeybees in forested and non-forested landscapes and to explore how pollen diversity compares between landscapes?
Casanelles-Abella et al.	2021	How wild bees find a way in European cities:Pollen metabarcoding unravels multiple feeding strategies and their effects on distribution patterns in four wild bee species	France, Switzerland, Poland, Belgium and Estonia, Europe	pollen from nests	E.Z.N.A. Tissue DNA Kit (silica-based membrane) & Quick-DNA MicroPrep Kit	ITS2	Specific ecological question	How is foraging affected by resource availability?	To assess how diet varies across urban areas and whether diet specialisation is linked to distribution?
Chang et al.	2018	Molecular-assisted pollen grain analysis reveals spatiotemporal origin of long-distance migrants of a noctuid moth	China, Asia	pollen from proboscis	NaOH	ITS2, rbcL	Specific ecological question	How does foraging change over time and space?	To illuminate the host relationship and geographic origin of Agrotis segetum moths
Fahimee et al.	2021	Metabarcoding in diet assessment of Heterotrigona itama based on trnl marker towards domestication program	Malaysia, Asia	DNA extracted from whole body?	NucleoSpin® DNA Insect (silica-based membrane)	trnL	Identifying floral resource use		To identify the plant species foraged and used by Heterotrigona itama
Danner et al.	2017	Honey bee foraging ecology: Season but not landscape diversity shapes the amount and diversity of collected pollen	Germany, Europe	pollen from legs	Macherey-Nagel Food Kit (silica-based membrane)	ITS2	Specific ecological question	How does foraging change over time and space?	To investigate pollen foraging by honeybees across the year
de Vere et al.	2017	Using DNA metabarcoding to investigate honey bee foraging reveals limited flower use despite high floral availability	UK (Wales), Europe	pollen from honey	DNeasy plant mini extraction kit (silica-based membrane)	rbcL	Specific ecological question	How does foraging change over time and space?	To investigate pollen foraging by honeybees
Dew et al.	2020	Diverse Diets with Consistent Core Microbiome in Wild Bee Pollen Provisions	USA, North America	pollen from nests	DNeasy blood and tissue kit (silica-based membrane)	rbcL	Specific ecological question	What is the relationship between plant use and pollinator health? & How does foraging change throughout time and space?	To assess how pollen species used varies across eastern US and whether this is linked to bacterial species present in larval provisions of a solitary bee, Ceratina calcarata
Donkersley et al.	2017	Nutritional composition of honey bee food stores vary with floral composition	UK (England), Europe	pollen from bee bread	DNeasy plant mini extraction kit (silica-based membrane)	ITS2	Specific ecological question	What is the relationship between plant use and pollinator health?	To identify the plant species in bee bread and analyse its nutritional value
Eeraerts et al.	2021	Landscapes with high amounts of mass-flowering fruit crops reduce the reproduction of two solitary bees	Belgium, Europe	pollen from nests	Invisorb spin tissue mini kit (silica-based membrane)	ITS2	Specific ecological question	How does foraging change over time and space?	To identify the diet of Osmia bees
Elliott et al.	2021	Pollen diets and niche overlap of honey bees and native bees in protected areas	Australia, Australia	pollen from legs	DNeasy plant mini extraction kit (silica-based membrane)	rbcL	Specific ecological question	How are resources partitioned between species and individuals in a plant-pollinator network?	To identify and compare the pollen diets of honeybees and native bees (species and genus level analysis)
Gresty et al.	2018	Flower preferences and pollen transport networks for cavity-nesting solitary bees: Implications for the design of agri-environment schemes	UK (England), Europe	pollen from nests	DNeasy plant mini extraction kit (silica-based membrane)	ITS2	Identifying floral resource use		To identify the key plant species used by cavity-nesting solitary bees and evaluate the suitability of forage resource provision in UK agri-environment schemes
MacIvor	2016	DNA barcoding to identify leaf preference of leafcutting bees	Canada, North America	leaf tissue from nests	CTAB and phenol:chloroform extraction	ITS2, rbcL	Identifying floral resource use		To identify the leaf preference of leafcutter bees (Megachile spp.) and assess whether they rely on related species
McMinn-Sauder et al	2020	Flowers in Conservation Reserve Program (CRP) Pollinator Plantings and the Upper Midwest Agricultural Landscape Supporting Honey Bees	USA, North America	pollen from legs	DNeasy plant mini extraction kit (silica-based membrane)	ITS2, rbcL, trnL	Identifying floral resource use		To identify floral resources most valuable to honeybees and also to assess the extent of seed mix utilisation
Muller & Richter	2018	Dual function of Potentilla (Rosaceae) in the life history of the rare boreoalpine osmiine bee Hoplitis (Formicapis) robusta (Hymenoptera, Megachilidae)	Switzerland, Europe	leaf tissue from nests	Maxwell 16 FFS nucleic acid extraction kit (magnetic particles)	ITS2, trnL	Identifying floral resource use		To identify the larval diet and nest building material of Hoplitis robusta
Gous et al.	2021	Floral hosts of leaf-cutter bees (Megachilidae) in a biodiversity hotspot revealed by pollen DNA metabarcoding of historic specimens	South Africa, Africa	pollen from scopa	DNeasy plant mini extraction kit (silica-based membrane)	ITS2	Specific ecological question	How does foraging change over time and space?	To investigate whether the floral choice of Megachilidae differs between two regions in Suth Africa (one diverse, one less-diverse)
Muller et al.	2019	Nesting in bark – the peculiar life history of the rare boreoalpine osmiine bee Osmia (Melanosmia) nigriventris (Hymenoptera, Megachilidae)	Switzerland, Europe	leaf tissue from nests	Maxwell 16 FFS nucleic acid extraction kit (magnetic particles)	ITS2, trnL	Identifying floral resource use		To identify the source of nest building material used by Osmia nigriventris
Hawkins et al.	2015	Using DNA metabarcoding to identify the floral composition of honey: A new tool for investigating honey bee foraging preferences	UK (Wales and England), Europe	pollen from honey	DNeasy plant mini extraction kit (silica-based membrane)	rbcL	Specific methodological question	How do the results from metabarcoding and microscopy compare?	To ﻿assess the potential of using DNA metabarcoding to characterise the floral composition of honey in order to investigate honey bee foraging
Jones et al.	2021	Shifts in honeybee foraging reveal historical changes in floral resources	UK (England, Wales, Scotland, Ireland), Europe	pollen from honey	DNeasy plant mini extraction kit (silica-based membrane)	ITS2, rbcL	Specific ecological question	How does foraging change over time and space?	To compare honeybee foraging between 1952 and 2017
Piko et al.	2021	Effects of three flower field types on bumblebees and their pollen diets	Germany, Europe	pollen from whole body	Macherey-Nagel Food Kit (silica-based membrane)	ITS2	Identifying floral resource use		To assess the use of flower fields (used in agri-environment schemes)
Kamo et al.	2018	A DNA barcoding method for identifying and quantifying the composition of pollen species collected by European honeybees, Apis mellifera (Hymenoptera: Apidae)	Japan, Asia	pollen from legs	DNeasy plant mini extraction kit (silica-based membrane)	trnL	Specific ecological question and method development	How does foraging change over time and space?	To develop a DNA barcoding method for identifying species in honeybee pollen and to demonstrate seasonal changes in species composition
Potter et al.	2019	Pollen metabarcoding reveals broad and species-specific resource use by urban bees	UK (England), Europe	pollen from whole body	DNeasy plant mini extraction kit (silica-based membrane)	rbcL	Identifying floral resource use		To investigate the foraging preferences of bees feeding in sown wildflower strips
Klečka et al.	unpublished	Individual-level specialisation and interspecific resource partitioning in bees revealed by pollen DNA metabarcoding	Czech Republic, Europe	pollen from nests	Macherey-Nagel Food Kit (silica-based membrane)	ITS2	Specific ecological question	How are resources partitioned between species and individuals in a plant-pollinator network?	To assess whether three species of Ceratina bee differ in their foraging preferences (species and individual level analysis)
Kratschmer et al.	2020	Pollen availability for the Horned mason bee (Osmia cornuta) in regions of different land use andlandscape structures	Austria, Europe	pollen from nests	MagSi-DNA Vegetal kit (magnetic beads)	trnL	Specific ecological question	How does foraging change over time and space?	To use metabarcoding as a supplement to microscopy to confirm taxa
Sponsler et al.	2020	A screening-level assessment of the pollinator-attractiveness of ornamental nursery stock using a honey bee foraging assay	USA, North America	pollen from legs	DNeasy plant mini extraction kit (silica-based membrane)	ITS2	Identifying floral resource use		To assess whether ornamental plants are attractive to honeybees?
Tanaka et al.	2020	Using pollen DNA metabarcoding to profile nectar sources of urban beekeeping in Kōtō-ku, Tokyo	Japan, Asia	pollen from honeycomb	MPure Bacterial DNA Extraction Kit (magnetic beads)	rbcL	Identifying floral resource use		To investigate pollen foraging by honeybees
Lowe et al.	In press	Seasonal progression and differences in major floral resource use by bees and hoverflies in a diverse horticultural and agricultural landscape revealed by DNA metabarcoding	UK (Wales), Europe	pollen from whole body	DNeasy plant mini extraction kit (silica-based membrane)	ITS2, rbcL	Specific ecological question	How does foraging change over time and space?	To identify plants used by honeybees, bumblebees, non-corbiculate bees and hoverflies over the flowering season and across two years
Lowe et al.	unpublished	Seasonal specialisation in floral resource use by honeybee colonies reveals periods of food shortage in a diverse horticultural and agricultural landscape	UK (Wales), Europe	pollen from honey	DNeasy plant mini extraction kit (silica-based membrane)	ITS2, rbcL	Specific ecological question	How does foraging change over time and space? & How is foraging affected by resource availability?	To investigate honeybee foraging through the year and use this information to explore if any periods of resource limitation exist
Lu et al.	2021	Metabarcoding Analysis of Pollen Species Foraged by Osmia excavata Alfken (Hymenoptera: Megachilidae) in China	China, Asia	pollen from nests	E.Z.N.A. Soil DNA Kit (silica-based membrane)	ITS2	Specific ecological question	How is foraging affected by resource availability?	To identify pollen plants of Osmia excavata over farmland, semi-natural habitats and orchards
Lucas et al.	2018	Generalisation and specialisation in hoverfly (Syrphidae) grassland pollen transport networks revealed by DNA metabarcoding	UK (Wales), Europe	pollen from whole body	DNeasy plant mini extraction kit (silica-based membrane)	rbcL	Specific ecological question	How are resources partitioned between species and individuals in a plant-pollinator network?	To investigate pollen transport network of Eristalis hoverflies (species and individual level analysis)
Lucas et al.	2018	Floral resource partitioning by individuals within generalised hoverfly pollination networks revealed by DNA metabarcoding	UK (Wales), Europe	pollen from whole body	DNeasy plant mini extraction kit (silica-based membrane)	rbcL	Specific ecological question	How are resources partitioned between species and individuals in a plant-pollinator network?	To investigate pollen transport in hoverfly communities (species and genus level analysis)
Lucek et al.	2019	Metabarcoding of honey to assess differences in plant-pollinator interactions between urban and non-urban sites	Switzerland, Europe	pollen from honey	CTAB and phenol:chloroform extraction	ITS2	Specific ecological question	How is foraging affected by resource availability?	To investigate honeybee foraging in urban and non-urban sites
Macgregor et al.	2019	Construction, validation and application of nocturnal pollen transport networks in an agro-ecosystem: a comparison using microscopy and DNA metabarcoding	UK (England), Europe	pollen from proboscis	HotSHOT approach	rbcL	Specific methodological question and identifying floral resource use	How do the results from metabarcoding and microscopy compare?	To construct nocturnal pollination networks and compare microscopy and metabarcoding
Vaudo et al.	2020	Introduced bees (Osmia cornifrons) collect pollen from both coevolved and novel host-plant species within their family-level phylogenetic preferences	USA, North America	pollen from nests	DNeasy plant mini extraction kit (silica-based membrane)	ITS2	Identifying floral resource use		To assess whether Osmia cornifrons has a preference for plants which are found in native range, or a phylogenetic affinity which is independent of the geographic origin of host plant
Mayr et al.	2021	Cryptic species and hidden ecological interactions of halictine bees along an elevational gradient	Tanzania, Africa	pollen from crop	Macherey-Nagel Food Kit (silica-based membrane)	ITS2	Specific ecological question	How does foraging change over time and space?	To assess whether pollen composition changes across an elevational gradient
McFrederick & Rehan	2016	Characterization of pollen and bacterial community composition in brood provisions of a small carpenter bee	USA, North America	pollen from nests	DNeasy blood and tissue kit (silica-based membrane)	rbcL	Specific ecological question	What is the relationship between plant use and pollinator health?	To investigate the relationship between pollen and bacteria in pollen provisions of a solitary bee, Ceratina calcarata
McFrederick & Rehan	2019	Wild Bee Pollen Usage and Microbial Communities Co-vary Across Landscapes	Australia, Australia	pollen from nests	DNeasy blood and tissue kit (silica-based membrane)	ITS, rbcL	Specific ecological question	What is the relationship between plant use and pollinator health? & How does foraging change throughout time and space?	To assess how pollen composition within larval provisions of the small carpenter bee Ceratina australensis varies across habitat and whether pollen composition correlates with microbial community composition?
Leidenfrost et al.	2020	Analyzing the Dietary Diary of Bumble Bee	Germany, Europe	pollen from legs	DNeasy plant mini extraction kit (silica-based membrane)	ITS2	Identifying floral resource use and method development		To ientify pollen source species of B. terrestris in agricultural landscapes using MinION
Michelot-Antalik et al.	2021	Comparison of grassland plant-pollinator networks on dairy farms in three contrasting French landscapes	France, Europe	pollen from whole body	Glass bead with Tris-HC, KCl and EDTA	ITS2	Specific ecological question	How is foraging affected by resource availability?	To supplement the use of pollen microscopy to identify how floral resource use is affected by availability
Mogren et al	2020	Diverging landscape impacts on macronutrient status despite overlapping diets in managed (Apis mellifera) and native (Melissodes desponsa) bees	USA, North America	pollen from gut	DNeasy blood and tissue kit (silica-based membrane)	trnL	Specific ecological question	What is the relationship between plant use and pollinator health?	To investigate the relationship between dietary composition and macronutrients in Apis mellifera and Melissodes desponsa
Wilson et al.	2010	Pollen foraging behaviour of solitary Hawaiian bees revealed through molecular pollen analysis	USA, North America	pollen from crop	DNeasy plant mini extraction kit (silica-based membrane)	ITS	Identifying floral resource use and method development		To identify floral resource use of Hylaeus bees
Bell et al.	2017	Applying Pollen DNA Metabarcoding to the Study of Plant–Pollinator Interactions	USA, North America	pollen from whole body	Macherey-Nagel Food Kit (silica-based membrane)	ITS2, rbcL	Method development		To develop methods for characterising networks via metabarcoding
Noël et al.	unpublished	Pollen meta-barcoding reveals foraging preferences of honeybees (Apis mellifera L.) along space-time gradient in Japan	Japan, Asia	pollen from legs	MPure Bacterial DNA Extraction Kit (magnetic beads)	ITS1	Specific ecological question	How does foraging change over time and space? & How is foraging affected by resource availability?	To explore the temporal and spatial foraging habits of Apis mellifera
Galimberti et al.	2014	A DNA barcoding approach to characterize pollen collected by honeybees	Italy, Europe	pollen from legs	DNeasy plant mini kit (silica-based membrane)	rbcL, trnH-psbA	Method development		To assess the effectiveness of DNA barcoding to identify species from pollen collected by honeybees
Park et al.	2017	Seasonal trends in honey bee pollen foraging revealed through DNA barcoding of bee-collected pollen	USA, North America	pollen from legs	DNeasy plant mini extraction kit (silica-based membrane)	matK, rbcL	Specific ecological question	How does foraging change over time and space?	To determine the seasonal patterns in colony recruitment dancing for pollen
Galliot et al.	2017	Investigating a flower-insect forager network in a mountain grassland community using pollen DNA barcoding	France, Europe	pollen from whole body	Glass bead with Tris-HC, KCl and EDTA	ITS2	Method development		To develop a method to track pollen transfer in a plant-pollinator network
Piot et al.	2021	More is less: mass-flowering fruit tree crops dilute parasite transmission between bees	Belgium, Europe	pollen from nests	Invisorb spin tissue mini kit (silica-based membrane)	ITS2	Specific ecological question	What is the relationship between plant use and pollinator health?	Do investigate whether parasites are transmitted between Osmia nests through the visitation of mass-flowering crops?
Pornon et al.	2017	DNA metabarcoding data unveils invisible pollination networks	France, Europe	pollen from whole body	Macherey-Nagel Food Kit (silica-based membrane)	matK, rbcL	Specific methodological question	How do the results from metabarcoding and observation compare?	To compare metabarcoding to visit surveys to detect links
Pornon et al.	2016	Using metabarcoding to reveal and quantify plant-pollinator interactions	France, Europe	mock pollen samples, & pollen from whole body	Macherey-Nagel Food Kit (silica-based membrane)	ITS1, tnrL	Specific methodological question	Is DNA metabarcoding quantitative?	To investigate the relationship between trnL and ITS1 sequences yielded from mock samples and whether sequences are quantitative from insect loads
Pornon et al.	2019	Pollinator specialization increases with a decrease in a mass-flowering plant in networks inferred from DNA metabarcoding	France, Europe	pollen from whole body	Macherey-Nagel Food Kit (silica-based membrane)	ITS1, trnL	Specific ecological question	How are resources partitioned between species and individuals in a plant-pollinator network?	To investigate the effects of mass-flowering plants on pollination networks (species and individual level analysis)
Gous et al.	2019	Plant–pollinator interactions over time: Pollen metabarcoding from bees in a historic collection	South Africa, Africa	pollen from scopa	DNeasy plant mini kit (silica-based membrane) - most consistent results in comparison to DNA Micro Kit and Nucleospin DNA trace kit	ITS1, ITS2, rbcL	Method development		To develop methods for obtaining metabarcodes from historic specimens
Quaresma et al.	2021	Preservation methods of honey bee-collected pollen are not a source of bias in ITS2 metabarcoding	Austria and Denmark, Europe	pollen from legs	Macherey-Nagel Food Kit (silica-based membrane)	ITS2	Specific methodological question	How do varying preservation methods affect results?	To identify the most appropriate method for preserving pollen for metabarcoding, particularly for use in citizen science studies
Quinlan et al.	2021	Honey bee foraged pollen reveals temporal changes in pollen protein content and changes in forager choice for abundant versus high protein flowers	USA, North America	pollen from legs	CTAB and phenol:chloroform extraction	ITS2	Specific ecological question	How does foraging change over time and space? & How is foraging affected by resource availability?	To investigate how pollen protein changes over space (colonies,apiaries and land-use categories) and time (annually and seasonally) by estimating protein content through identifying plant taxa. To assess the relationship between floral abundance and collected plants.
Kaluza et al.	2017	Generalist social bees maximize diversity intake in plant species-rich and resource-abundant environments	Australia, Australia	pollen from legs	Macherey-Nagel Food Kit (silica-based membrane)	ITS2	Method development		To validate colour assessment of pollen loads collected by Tetragonula carbonaria
Richardson et al.	2015	Rank‐based characterization of pollen assemblages collected by honey bees using a multi‐locus metabarcoding approach	USA, North America	pollen from legs	DNeasy plant mini extraction kit (silica-based membrane)	ITS2, matK, rbcL	Specific methodological question	Is DNA metabarcoding quantitative?	To improve understading of the quantitative capacity of barcode regions and primer sets
Richardson et al.	2021	Application of plant metabarcoding to identify diverse honeybee pollen forage along an urban–agricultural gradient	USA, North America	pollen from legs	DNeasy plant mini extraction kit (silica-based membrane)	ITS2, rbcL, trnL	Specific ecological question	How is foraging affected by resource availability?	To investigate how foraging relates to landscapes of varying urbanisation?
Richardson et al.	2019	Quantitative multi-locus metabarcoding and waggle dance interpretation reveal honey bee spring foraging patterns in Midwest agroecosystems	USA, North America	pollen from legs	DNeasy plant mini extraction kit (silica-based membrane)	ITS2, rbcL, trnL, trnH-psbA	Specific ecological question	How does foraging change over time and space?	To investigate pollen foraging by honeybees across space
Keller et al.	2015	Evaluating multiplexed next-generation sequencing as a method in palynology for mixed pollen samples	Germany, Europe	pollen from legs & pollen from nests	Macherey-Nagel Food Kit (silica-based membrane)	ITS2	Method development		To develop methods for next-gen sequencing of mixed pollen samples and bioinformatic workflow
Simanonok et al	2021	Honey bee-collected pollen richness and protein content across an agricultural land-use gradient	USA, North America	pollen from legs	CTAB and phenol:chloroform extraction	ITS1, ITS2	Specific ecological question	Howis foraging affected by resource availability? & What is the relationship between plant use and pollinator health?	To investigate whether pollen composition changes across land-use types and to explore how pollen protein content is related to its taxonomic richness
Simanonok et al.	2021	A century of pollen foraging by the endangered rusty patched bumble bee (Bombus affinis): inferences from molecular sequencing of museum specimens	USA, North America	pollen from legs	CTAB and phenol:chloroform extraction	ITS2	Specific ecological question	How does foraging change over time and space?	To construct a historical foraging profile of Bombus affinis from 1913-2013 using historical specimens
Smart et al.	2017	A comparison of honey bee-collected pollen from working agricultural lands using light microscopy and its metabarcoding	USA, North America	pollen from legs	CTAB and phenol:chloroform extraction	ITS1, ITS2	Specific ecological question	How is foraging affected by resource availability?	To investigate pollen use over a land use gradient and to compare microscopy and metabarcoding
Sponsler et al.	2020	Characterizing the floral resources of a North American metropolis using a honey bee foraging assay	USA, North America	pollen from legs	DNeasy plant mini extraction kit (silica-based membrane)	ITS1, ITS2, trnL	Specific ecological question	How does foraging change over time and space?	To use pollen samples to monitor resource use and availability over time and space
Laha et al.	2017	Meta-barcoding in combination with palynological inference is a potent diagnostic marker for honey floral composition	India, Asia	pollen from honey	CTAB and phenol:chloroform extraction	ITS2, matK, rbcL	Method development		To verify the hypothesis that pollen metabarcoding of honey yields more information than using microscopy
Suchan et al.	2018	Pollen metabarcoding as a tool for tracking long-distance insect migrations	Spain, Europe	pollen from whole body	Direct PCR method	ITS2	Specific ecological question	How does foraging change over time and space?	To investigate migration patterns through the identification of pollen from Vanessa cardui
Swenson & Gerneinholzer et al.	2021	Testing the effect of pollen exine rupture on metabarcoding with Illumina sequencing	N/A	mock pollen samples	Macherey-Nagel Food Kit (silica-based membrane)	ITS1, ITS2, rbcL	Specific methodological question	How do varying DNA metabarcoding extraction methods affect results?	To investigate the effect of exine rupture and lysis incubation time on extraction and sequencing
Richardson et al.	2015	Application of ITS2 Metabarcoding to Determine the Provenance of Pollen Collected by Honey Bees in an Agroecosystem	USA, North America	pollen from legs	DNeasy plant mini extraction kit (silica-based membrane)	ITS2	Method development		Method development for honey metabarcoding
Tommasi et al.	2021	Impact of land use intensification and local features on plants and pollinators in Sub-Saharan smallholder farms	Tanzania, Africa	pollen from whole body	DNeasy plant mini extraction kit (silica-based membrane)	ITS2	Specific ecological question	How is foraging affected by resource availability?	To explore how plant-pollinator assemblages are shaped by land use intensification
Sickel et al.	2015	Increased efficiency in identifying mixed pollen samples by meta-barcoding with a dual-indexing approach	Germany, Europe	pollen from nests	Macherey-Nagel Food Kit (silica-based membrane)	ITS2	Method development		To develop protocol for highly multiplexed pollen sequencing utilising a dual-indexing strategy
Trinkl et al.	2020	Floral species richness correlates with changes in the nutritional quality of larval diets in a stingless bee	Australia, Australia	pollen from nests	Macherey-Nagel Food Kit (silica-based membrane)	ITS2	Specific ecological question	What is the relationship between plant use and pollinator health?	To investigate whether differences in plant species richness correlate with variation in floral diversity and nutritional quality of larval provisions in Tetragonula carbonaria
Tremblay et al.	2019	High‐resolution biomonitoring of plant pathogens and plant species using metabarcoding of pollen pellet contents collected from a honey bee hive	Canada, North America	pollen from legs	DNeasy plant mini extraction kit (silica-based membrane)	ITS2	Method development		To develop methods for using pollen pellet contents to monitor plant pests
Valentini et al.	2010	DNA barcoding for honey biodiversity	N/A	pollen from honey	DNeasy blood and tissue kit (silica-based membrane)	trnL	Method development		Method development for honey metabarcoding
Voulgari-Kokota et al.	2019	Linking pollen foraging of megachilid bees to their nest bacterial microbiota	Germany, Europe	pollen from nests	Macherey-Nagel Soil kit (silica-based membrane)	ITS2	Specific ecological question	What is the relationship between plant use and pollinator health?	To investigate the relationship between pollen and bacteria in pollen provisions of a range of solitary bee species
Nürnberger et al.	2019	Honey bee waggle dance communication increases diversity of pollen diets in intensively managed agricultural landscapes	Germany, Europe	pollen from legs	MPure Bacterial DNA Extraction Kit (magnetic beads)	ITS2	Other		To study how dance communication affects the diversity of pollen diets
Wilson et al.	2021	Many small rather than few large sources identified in long-term bee pollen diets in agroecosystems	Australia, Australia	pollen from nests	DNeasy plant mini extraction kit (silica-based membrane)	ITS2, rbcL	Specific ecological question	How does foraging change over time and space? & How is foraging affected by resource availability?	To assess how foraging of Tetragonula carbonaria changes over time and land use and to improve the understanding of its diet
